# Supplementary material
Source: MDPI journal article supplement (https://www.mdpi.com/2073-4344/12/4/390)
Supplement: s1 [file s1]

**SUPPLEMENTARY MATERIALS**

# **Ni-Cu/Al<sub>2</sub>O<sub>3</sub> from Layered Double Hydroxides Hydrogenates Furfural to Alcohols**

**Abdulaziz Aldureid <sup>1,\*</sup>, Francisco Medina <sup>1</sup>, Gregory S. Patience <sup>2</sup> and Daniel Montané <sup>1</sup>**

<sup>1</sup> Departament d'Enginyeria Química, Universitat Rovira i Virgili, Av. Països Catalans, 26, E-43007 Tarragona, Spain; francesc.medina@urv.cat (F.M.); daniel.montane@urv.cat (D.M.)

<sup>2</sup> Chemical Engineering, Polytechnique Montréal, C.P. 6079, Succ. "CV", Montréal, QC H3C 3A7, Canada;  
gregory-s.patience@polymtl.ca (G.S.P)

\* Correspondence: abdulaziz.aldureid@urv.cat

Table S1. Selectivity and conversion during furfural hydrogenation in the pressurized SSR and atmospheric PBR reactors.

|            | Stirred slurry reactor (SSR)                           |                                                    |                                                        | Tubular reactor (PBR)                                  |                                                    |                                                        |
|------------|--------------------------------------------------------|----------------------------------------------------|--------------------------------------------------------|--------------------------------------------------------|----------------------------------------------------|--------------------------------------------------------|
|            | Ni <sub>0.5</sub> Cu <sub>1.5</sub> Al <sub>1</sub> -R | Ni <sub>1</sub> Cu <sub>1</sub> Al <sub>1</sub> -R | Ni <sub>1.5</sub> Cu <sub>0.5</sub> Al <sub>1</sub> -R | Ni <sub>0.5</sub> Cu <sub>1.5</sub> Al <sub>1</sub> -R | Ni <sub>1</sub> Cu <sub>1</sub> Al <sub>1</sub> -R | Ni <sub>1.5</sub> Cu <sub>0.5</sub> Al <sub>1</sub> -R |
| Conversion | 100.                                                   | 100.                                               | 100.                                                   | 91                                                     | 99                                                 | 99                                                     |
| FA         | 22                                                     | 9.2                                                | 24                                                     | 57                                                     | 61                                                 | 58                                                     |
| FUR        | 13                                                     | 5.3                                                | 1.4                                                    | 9.9                                                    | 11                                                 | 7.4                                                    |
| mFUR       | 12                                                     | 4.3                                                | 2.7                                                    | 6.9                                                    | 1.5                                                | 1.0                                                    |
| TFA        | 32                                                     | 63                                                 | 56                                                     | 2.3                                                    | 2.3                                                | 2.1                                                    |
| THF        | 0.3                                                    | 0.9                                                | 1.0                                                    | 2.6                                                    | 2.1                                                | 0.2                                                    |
| mTHF       | 3.3                                                    | 2.4                                                | 1.2                                                    | 1.0                                                    | 0.5                                                | 1.3                                                    |
| 12PD       | 4.3                                                    | 3.4                                                | 2.6                                                    | -                                                      | -                                                  | -                                                      |
| 15PD       | -                                                      | 0.2                                                | 0.4                                                    | -                                                      | -                                                  | -                                                      |
| 1PE        | 0.2                                                    | -                                                  | -                                                      | 0.2                                                    | 0.3                                                | 0.6                                                    |
| 1BU        | 0.2                                                    | 0.1                                                | 0.1                                                    | 1.6                                                    | 1.6                                                | 11                                                     |
| CP         | -                                                      | -                                                  | -                                                      | 0.1                                                    | 0.2                                                | 0.3                                                    |
| CPO        | -                                                      | -                                                  | -                                                      | 0.6                                                    | 0.8                                                | 0.8                                                    |
| TFEE       | 2.3                                                    | 5.2                                                | 4.8                                                    | 1.9                                                    | -                                                  | -                                                      |
| DFE        | 5.6                                                    | 3.0                                                | 4.3                                                    | 2.8                                                    | 2.2                                                | 1.0                                                    |
| Other      | 4.6                                                    | 2.6                                                | 1.7                                                    | 14                                                     | 17                                                 | 16                                                     |

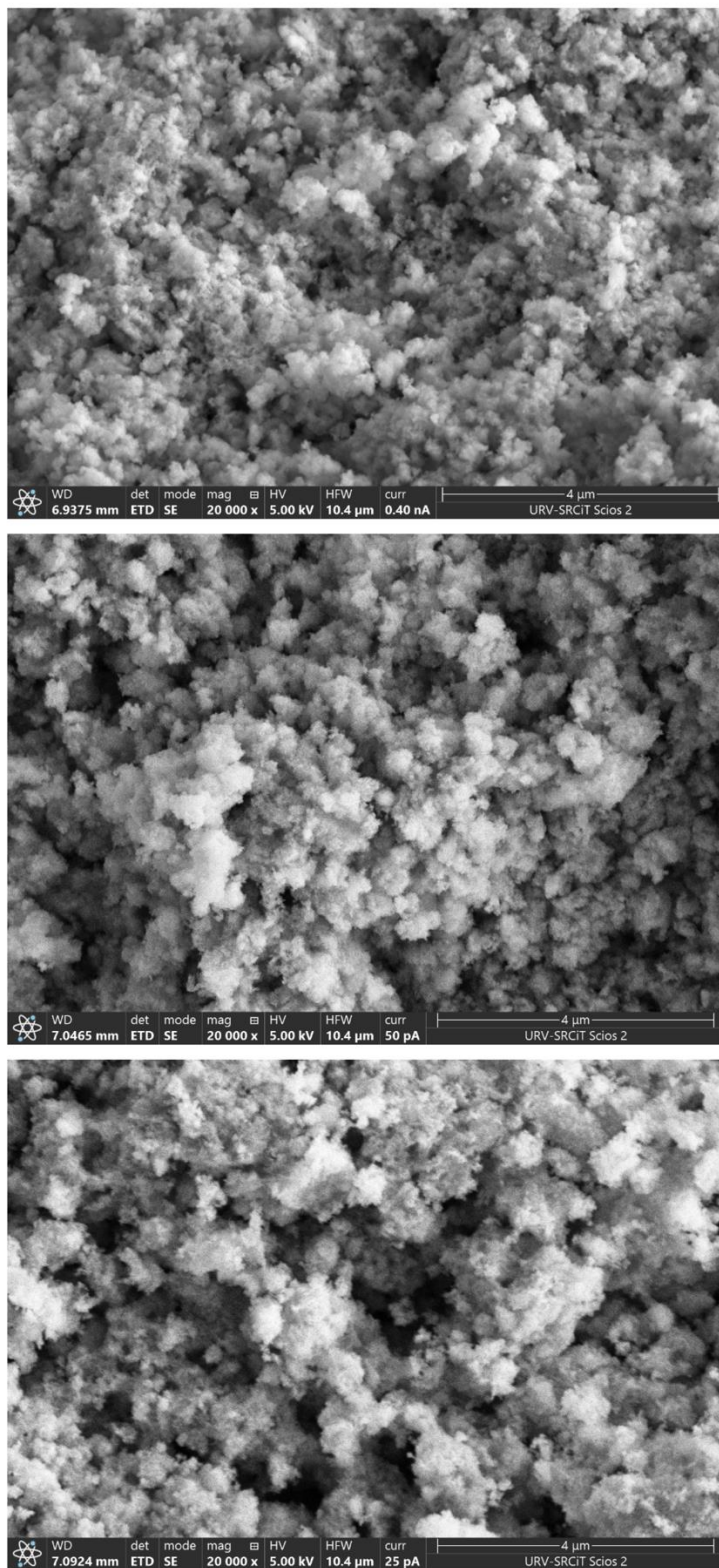

Figure S1. SEM imaging of the calcined materials (20 000 x magnification):  $\text{Ni}_{1.5}\text{Cu}_{0.5}\text{Al}_1$  (top),  $\text{Ni}_1\text{Cu}_1\text{Al}_1$  (center) and  $\text{Ni}_{0.5}\text{Cu}_{1.5}\text{Al}_1$  (bottom)

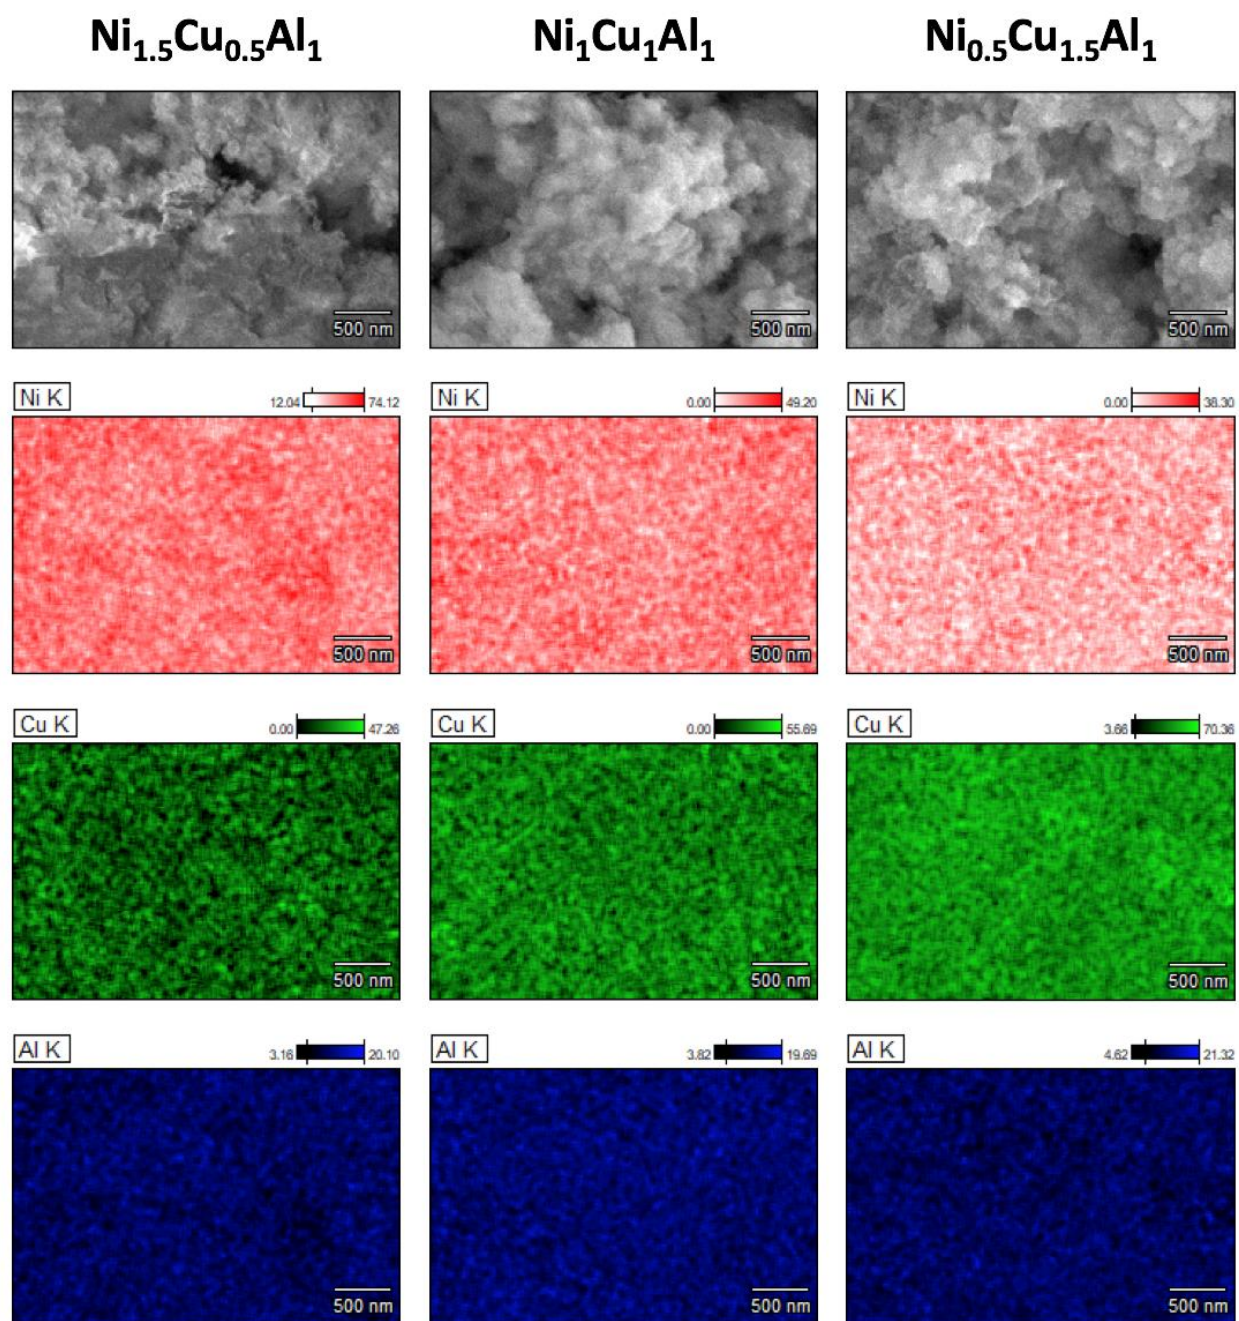

Figure S2. Surface composition of the LDHs precursors calcined at 673 K for 4h measured by EFSEM-EDX

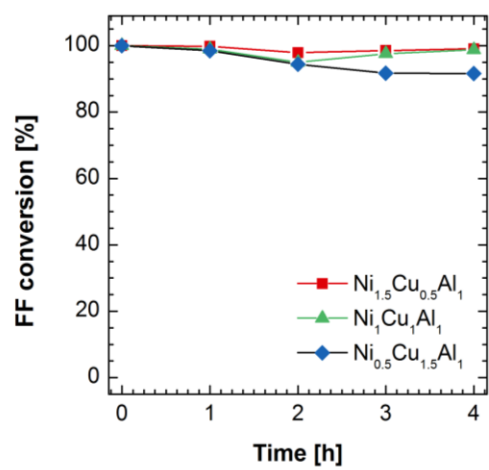

Figure S3. Furfural conversion in the atmospheric PBR at 463 K and a WHSV of  $2.85 \text{ g}_{\text{FF}} \text{ g}_{\text{cat}}^{-1} \text{ h}^{-1}$ .
